1 **Barley ROP-INTERACTIVE PARTNER-a organizes into RAC1- and MICROTUBULE-**  
2 **ASSOCIATED ROP-GTPASE ACTIVATING PROTEIN 1-dependent membrane domains**

3 Caroline Hoefle, Christopher McCollum, Ralph Hückelhoven#

4 Chair of Phytopathology, TUM School of Life Sciences Weihenstephan, Technical University  
5 of Munich, Emil Ramann Str. 2, 85354 Freising, Germany

6 #Corresponding author: [hueckelhoven@wzw.tum.de](mailto:hueckelhoven@wzw.tum.de)

7

## 8 **Abstract**

9 Small ROP (also called RAC) GTPases are key factors in polar cell development and in  
10 interaction with the environment. ROP-Interactive Partner (RIP) proteins are predicted scaffold  
11 or ROP-effector proteins, which function downstream of activated GTP-loaded ROP proteins  
12 in establishing membrane heterogeneity and cellular organization. Grass ROP proteins  
13 function in cell polarity, resistance and susceptibility to fungal pathogens but grass RIP proteins  
14 are little understood.

15 We found that the barley (*Hordeum vulgare* L.) RIPa protein can interact with barley ROPs in  
16 yeast. Fluorescent-tagged RIPa, when co-expressed with the constitutively activated ROP  
17 protein CA RAC1, accumulates at the cell periphery or plasma membrane. Additionally, RIPa,  
18 locates into membrane domains, which are laterally restricted by microtubules, when co-  
19 expressed with RAC1 and MICROTUBULE-ASSOCIATED ROP-GTPASE ACTIVATING  
20 PROTEIN 1. Both structural integrity of MICROTUBULE-ASSOCIATED ROP-GTPASE  
21 ACTIVATING PROTEIN 1 and microtubule stability are key to maintenance of RIPa-labeled  
22 membrane domains. In this context, RIPa also accumulates at the interface of barley and  
23 invading hyphae of the powdery mildew fungus *Blumeria graminis* f.sp. *hordei*.

24 Data suggest that barley RIPa interacts with barley ROPs and specifies RAC1 activity-  
25 associated membrane domains with potential signaling capacity. Lateral diffusion of this RAC1  
26 signaling capacity is restricted the resulting membrane heterogeneity requires intact  
27 microtubules and MICROTUBULE-ASSOCIATED ROP-GTPASE ACTIVATING PROTEIN 1.  
28 Focal accumulation of RIPa at sites of fungal attack may indicate locally restricted ROP activity  
29 at sites of fungal invasion.

30

31 **Keywords:** *Arabidopsis thaliana*, *Hordeum vulgare*, interactor of constitutive active ROPs,  
32 membrane asymmetry, microtubule, RAC GTPase, ROP GTPase, susceptibility, resistance

33

## 34 Introduction

35 In plants, ROP (RHO of plants) small GTPases are the only members of the RHO protein  
36 family, which consists of several subfamilies (RHO, RAC, CDC42, Rnd und RhoBTB) in  
37 mammals [1, 2]. ROPs organize a bunch of cellular processes as signaling GTPase. Among  
38 the most prominent ROP-regulated events are the subcellular organization of the cytoskeleton  
39 and vesicular traffic [3]. ROP-regulated cellular organization is crucial for normal plant  
40 development e.g. in polar cell growth or asymmetric cell division but also in interaction with the  
41 environment e.g. in regulation of stomata aperture or in interaction with pathogens. ROP  
42 activity is tightly regulated via proteins that facilitate hydrolysis and exchange of ROP-bound  
43 nucleotides. ROP-GDP is the signaling-inactive form of ROP and can be further controlled by  
44 ROP-GDIs (ROP-guanine nucleotide dissociation inhibitors) that bind to ROP-GDP. ROP-  
45 GDIs support cytosolic localization of ROPs most likely by direct binding of isoprenyl-residues  
46 at the C-terminus of type I ROPs, which carry a CAAX-box prenylation motif. ROP-GDP further  
47 can interact with different types of ROP guanine nucleotide exchange factors (GEFs), which  
48 support the release of GDP and binding of GTP. This turns the protein into activated ROP-  
49 GTP that signals downstream. ROP GTPase-activating proteins (GAPs) then can switch off  
50 activated ROPs again by supporting the otherwise low intrinsic GTPase function of ROPs and  
51 facilitating GTP hydrolysis [3, 4]. Negatively charged lipids at the inner leaflet of the plasma  
52 membrane may further function in ROP-positioning and signaling [5, 6].

53 In barley, distinct ROP GTPases are susceptibility factors in the interaction with the powdery  
54 mildew fungus *Blumeria graminis* f.sp. *hordei* (*Bgh*). Several ROPs, when constitutively  
55 activated (CA) by mutations in the GTPase domain, can support invasion of epidermal cells by  
56 fungal hyphae, which subsequently form a haustorium as a feeding cell in a living epidermal  
57 cell of barley [7]. *Vice versa*, sequence-specific RNA interference for silencing *RACB* renders  
58 barley less susceptible to fungal invasion and limits disease development [8, 9]. *RACB*'s  
59 physiological function is described in polar cell development during formation of root hairs and  
60 leaf stomata complexes [10]. Since *Bgh* appears to target *RACB* directly by an virulence  
61 effector, it was suggested that the fungus exploits a plant polar cell developmental pathway for

62 the accommodation of haustoria in living barley cells [11]. Another barley ROP called RAC1,  
63 has a less well understood function in the interaction with *Bgh*. Transient expression of CA  
64 RAC1 in single epidermal cells did not render barley supersusceptible [7]. However, the same  
65 open reading frame, when stably expressed in transgenic barley, supported fungal penetration  
66 but also the generation of reactive oxygen species in non-penetrated cells. CA RAC1 further  
67 supported barley resistance to the rice blast fungus *Magnaporthe oryzae*, similar to what was  
68 reported before for the function of rice RAC1, which is 86% identical to barley RAC1 [4, 12].

69 The barley genome encodes several predicted ROP-GAP proteins, but only the MAGAP1  
70 (MICROTUBULE-ASSOCIATED ROP-GTPASE ACTIVATING PROTEIN 1) has been  
71 characterized thus far. MAGAP1 contains a CRIB motif (for CDC42/RAC-Interactive Binding)  
72 and can bind to both RACB and RAC1 and is associated with microtubules. However, besides  
73 a localization at MTs, MAGAP1 positions at the cell periphery when recruited by CA RACB and  
74 to a minor extent in the cytoplasm. MAGAP1 is considered as a functional antagonist of RACB  
75 because MAGAP1 overexpression limits susceptibility whereas *MAGAP1* silencing supports  
76 susceptibility to penetration by *Bgh* [9]. Additionally, potentially ROP-regulated stability and  
77 polarity of MTs is associated with resistance to fungal penetration in barley [9, 11, 13].

78 ROP-GTP signals downstream via protein-protein interaction that depends of the ROP-loaded  
79 nucleotide and hence the three-dimensional constitution of ROPs. Proteins, which mediate  
80 ROP downstream effects, are commonly called ROP-effectors. However, not all ROP-effectors  
81 directly fulfill a function in cellular organization but instead are suggested to be scaffolds or  
82 adapter proteins that link activated ROPs with downstream factors. RIPs (ROP-Interactive  
83 Partner, also called Interactor of Constitutive Active ROPs [ICR]) and RICs (ROP-Interactive  
84 CTRIB motif-containing proteins) are such ROP-effectors without known biochemical but  
85 potential ROP-scaffolding function [3].

## 86 **Results**

87 *Barley RIPa is a ROP binding protein*



88 Because ROP signaling and microtubule organization seems to be important in interaction of  
89 barley and *Bgh*, we looked for candidate proteins that potentially are involved in both  
90 processes. *Arabidopsis thaliana* RIP3 (also called ICR5 and microtubule depletion domain 1,  
91 MIDD1) can interact with ROPs and MT-associated kinesin13A *in planta* [14]. Oda and co-  
92 workers found RIP3/MIDD1 to be part of a ROP regulatory module, which determines MT  
93 organization and subcellular cell wall deposition in xylem cells [15-17]. We therefore  
94 speculated that barley proteins with homology to RIP3 (AT3G53350) can act in ROP signaling  
95 during fungal invasion or defensive plant cell wall apposition (see also [18]). The barley locus  
96 HORVU3Hr1G087430.11 (protein accession F2DI37\_HORVV) encodes the barley protein  
97 with the highest similarity to Arabidopsis RIP3). However, protein identity between these  
98 Arabidopsis and barley RIP proteins is only 36% and the barley protein is with 510 amino acids  
99 much longer than Arabidopsis RIP3 with 396 amino acids. We thus named the barley protein  
100 RIPA instead of RIP3 because based on that we cannot predict whether barley RIPA is indeed  
101 the orthologue of Arabidopsis RIP3. To confirm that RIPA might be a ROP-binding protein, we  
102 checked protein-protein interaction in a targeted yeast-two-hybrid assay and found that RIPA  
103 interacts with RACB and RAC1 from barley as well as with CA versions of these proteins but  
104 not with dominant negative versions (Fig. 1). RIPA appears thus to be able to interact in yeast  
105 with so-called type I ROPs carrying a carboxyterminal CAAX-box prenylation signal as well as  
106 with type II ROPs that are predicted to be constitutively palmitoylated [7, 19].

107

#### 108 *ROPs can influence subcellular localization of RIPA*

109 We then studied subcellular localization of RIPA by confocal laser scanning microscopy. When  
110 we expressed a yellow fluorescing fusion protein, YFP-RIPA, the fluorescence signal was  
111 always detectable in the cytoplasm and strong in undefined speckles, which were little mobile  
112 and only co-localized partially with the microtubule (MT)-marker RFP-MAGAP1-Cterm, which  
113 contains the MT-binding domain of MAGAP1 but does not interact with ROPs because it lacks  
114 the ROP-binding CRIB and GAP domains (see below and Hoefle, 2011 #398) (Fig. 2).

115 We hypothesized that the speckled localization of YFP-RIPa represents protein aggregates  
116 that form when a scaffold protein is expressed without a corresponding amount of protein  
117 binding partners. RIPa could also interact with itself in yeast-2-hybrid assays and hence might  
118 form multimers when ectopically expressed (Additional file 1). To test, whether co-expression  
119 of potential binding partners might change subcellular localization of YFP-RIPa, we co-  
120 expressed RAC1, CA RAC1 and DN RAC1. Astonishingly, both expression of RAC1 or CA  
121 RAC1 completely changed subcellular localization of YFP-RIPa. RAC1 fully recruited YFP-  
122 RIPa to the cell periphery or plasma membrane and to a minor extent also to MTs, whereas  
123 CA RAC1 recruited YFP-RIPa exclusively to the cell periphery/plasma membrane. DN RAC1  
124 did not recruit YFP-RIPa or perhaps even enhanced protein aggregation in speckles (Figure 3).  
125 Together, data suggest that CA or wildtype switchable RAC1 can influence the localization of  
126 YFP-RIPa most likely by direct protein interaction. In figure 3, a red fluorescing MT-marker was  
127 co-expressed. To further exclude that the marker influenced YFP-RIPa localization, we  
128 repeated the experiments with free mCherry as cytoplasmic and nucleoplasmic marker.  
129 Similar to what was observed before, CA RAC1 and also CA RACB recruited YFP-RIPa to the  
130 cell periphery, whereas DN RAC1 and DN RACB did not (Additional file 2).

### 131 *A ROP - ROP-GAP module positions RIPa in MT-restricted domains at the cell periphery*

132 Arabidopsis RIP3/MIDD1 localizes into MT-restricted membrane domains when co-expressed  
133 with the type II ROP ROP11, the catalytically active domain of ROP-GEF4 and ROP-GAP3  
134 [16]. We hence speculated that co-expression of the barley ROP-GAP MAGAP1 and the barley  
135 type II ROP RAC1 could modulate subcellular localization of YFP-RIPa. Therefore, we first  
136 confirmed that MAGAP1 can interact with RAC1 in yeast and can recruit GFP-tagged MAGAP1  
137 from MTs to the cell periphery/plasma membrane (Additional file 3). We also found that  
138 MAGAP1 does not interact with RIPa in yeast (Additional file 1). We then used the MT marker  
139 DsRED-MAP4 and coexpressed it with YFP-RIPa, with untagged MAGAP1 and untagged  
140 RAC1. This led to accumulation of YFP-RIPa in MT-restricted domains at the cell  
141 periphery/plasma membrane. In this situation, MT-rich and YFP-RIPa-rich domains of the cell  
142 periphery mutually excluded or depleted each other (Figure 4). Similar images were recorded

143 when we used RFP-MAGAP1-Cterm as an alternative MT marker. Additionally, MTs appeared  
144 to function in formation or restriction of the YFP-RIPa-enriched domains because treatment  
145 with 30  $\mu$ M of the MT-depolymerizing drug oryzalin led to both disappearance of detectable  
146 MTs and the destruction of these domains and to more evenly peripheral localization of YFP-  
147 RIPa (Figure 5). We also wanted to get more evidence for importance of MAGAP1 in  
148 heterogeneity of the YFP-RIPa distribution. Therefore, we co-expressed RAC1 and YFP-RIPa  
149 with different versions of labelled RFP-MAGAP1 to see whether a functional ROP-GAP is  
150 required to form the observed YFP-RIPa membrane domains. We used either full length RFP-  
151 MAGAP1 or a version, which lacked the carboxyterminal MT-associating domain (MAGAP1-  
152  $\Delta$ Cterm), or the MT marker RFP-MAGAP1-Cterm, which lacks the ROP-binding CRIB and  
153 GAP domains (see figure Fig. 6A for domain composition of MAGAP1 versions). In these  
154 experiments we did not co-express untagged MAGAP1. Again, co-expression of full length  
155 RFP-MAGAP1 resulted in patchy domains of YFP-RIPa at the cell periphery/plasma  
156 membrane, which were restricted by RFP-MAGAP1 labelled MTs. Interestingly, using RFP-  
157 MAGAP1-Cterm instead of full length RFP-MAGAP1, completely dissolved the accumulation  
158 of YFP-RIPa in specific membrane domains but showed YFP-RIPa distribution at the entire  
159 cell periphery/plasma membrane. Hence, the ROP-interacting domains of MAGAP1 appeared  
160 to be necessary for the formation of distinct YFP-RIPa-labelled membrane domains. Strikingly,  
161 when we used RFP-MAGAP1- $\Delta$ Cterm, this protein seemed to be recruited by RAC1 to the cell  
162 periphery/plasma membrane and YFP-RIPa appeared again in speckles of unknown nature.  
163 This suggests that RFP-MAGAP1- $\Delta$ Cterm outcompeted YFP-RIPa from the interaction with  
164 RAC1 and hence a pattern occurred that is similar to that observed under co-expression of DN  
165 RAC1, which does not bind RIPa (compare Figs. 1 and 3).

166

### 167 *RIPa accumulates at sites of fungal attack*

168 When transiently over-expressed in barley epidermal cells, CA RAC1 does not significantly  
169 support or inhibit penetration by *Bgh*. We also did not measure a significant influence of

170 transient RIPa over-expression on *Bgh* penetration success, when we applied the exact  
171 experimental protocol, in which RIPb over expression supports fungal penetration [18]. Yeast-  
172 two-hybrid assays did not suggest a direct interaction between RIPa and the *Bgh* virulence  
173 effector ROPIP1, which may target barley RACB but can also bind RAC1 in yeast [11]  
174 (Additional file 1). We hence wondered how YFP-RIPa would localize in interaction with *Bgh*.  
175 When we inoculated leaves, in which we co-expressed YFP-RIPa, RAC1, MAGAP1 and the  
176 MT marker RFP-MAGAP1-Cterm, we detected, albeit somewhat less clear than in non-  
177 inoculated leaves, patterns of mutually exclusive MTs and YFP-RIPa-labelled membrane  
178 domains. Additionally, YFP-RIPa clearly labelled a zone around the site of fungal attack likely  
179 representing plasma membrane that directly attached to the defensive cell wall apposition that  
180 barley forms in response to the penetration attempt from the fungal appressorium (Fig. 7) [20].  
181 Since we expressed RAC1 in its wild type form in these experiments, we also inoculated cells  
182 expressing YFP-RIPa under co-expression of CA RAC1 or DN RAC1. This revealed that YFP-  
183 RIPa localized to sites of fungal attack in cells with CA RAC1, too, but remained in unknown  
184 speckles, when co-expressed with DN RAC1 (Additional file 4).

185

## 186 **Discussion**

### 187 *RIPa is a ROP-binding protein*

188 Signalling RHO GTPases are crucial for cell polarity and cell development across the border  
189 of kingdoms. In plants, ROPs are increasingly well understood as molecular hubs that integrate  
190 signals from the cell periphery or apoplast and hormone responses to translate this into cellular  
191 organization of the cytoskeleton or membrane trafficking machinery. This serves among others  
192 polar cell development or response to pathogens and cell wall sensing [4, 21, 22]. To translate  
193 signalling cues into downstream-signalling ROP-GTP interacts with so-called ROP-effectors  
194 that either perform a direct function or serve as scaffolds for recruitment of other downstream  
195 factors in higher order complexes. The knowledge on plant ROP-effectors is constantly  
196 increasing but still very incomplete and for many ROP-effectors, we lack knowledge about the

197 molecular mechanism, by which they control cellular organization [3]. Therefore and because  
198 ROP signaling is involved in plant resistance and susceptibility to diseases, we are interested  
199 in finding further ROP-effectors. We search for them in barley, because i. in monocot crops the  
200 knowledge on ROP signalling is even less complete than in Arabidopsis, ii. barley ROPs are  
201 involved in pathogenesis of powdery mildew, and iii. the interaction of plants with powdery  
202 mildew fungi is a model system for studying the cell biology of plant-microbe interactions [23].  
203 Based on what we and others found for RIP/ICR proteins in Arabidopsis, we identified barley  
204 RIPA as a candidate ROP-effector. We found that it preferentially interacts with the activated  
205 form of both type I and type II ROPs. This is similar to RIPs of Arabidopsis, which interact with  
206 diverse ROPs in yeast. Additionally, there is also genetic interaction of ROPs and RIPs *in*  
207 *planta* [14, 24, 25] [17]. In addition to our yeast-based interaction assays, the dynamics of  
208 subcellular RIPA localization upon co-expression of different versions of ROPs suggest that  
209 ROPs can interact with RIPA *in planta*. The fact that constitutively GTP-loaded CA RAC1 and  
210 wild type RAC1, which can be naturally loaded with GTP, recruited RIPA to the cell periphery  
211 strongly supports that RIPA interacts with signalling forms of ROPs such as RAC1-GTP at the  
212 plasma membrane. The partial accumulation of RIPA in unknown speckles, when  
213 overexpressed alone or with DN RAC1 or DN RACB further suggests that RIPA without a  
214 matching amount of binding partner forms aggregates or accumulates in unidentified cellular  
215 compartments. This is different to barley RIPb, which we recently found in the cytosol, at MTs  
216 and the cell periphery, when expressed alone. However, RIPb is naturally expressed on a  
217 higher level in the barley epidermis, when compared to RIPA, and hence might be also co-  
218 expressed with higher amounts of natural binding partners in the barley epidermis [18].

219

220 *ROP activity and MTs control symmetry breaking of plasma membrane domains labelled by*  
221 *RIPA*

222 The recruitment of RIPA by CA RAC1 or CA RACB suggested that the membrane association  
223 of RIPA depends on ROP signalling activity. We hence tested whether we can reconstitute a

224 ROP-activation-deactivation module similar to what was reported for Arabidopsis xylem, in  
225 which RIP3/MIDD1 coordinates locally restricted cell wall apposition, and *Nicotiana*  
226 *benthamiana* epidermal cells. In these models, expression of ROP11, the catalytic domain of  
227 ROP-GEF4, ROP-GAP3 and RIP3/MIDD1 provokes symmetry breaking of the plasma  
228 membrane into zones with high and low ROP activity. This becomes visible by the presense  
229 of RIP3/MIDD1 in membrane domains of high ROP activity [16, 22]. RIP3/MIDD1 can further  
230 interact with kinesin13A *in planta* [14] and recruits this protein into areas of high ROP activity,  
231 where it supports the depolymerization of MTs from the plus end. *Vice versa*, MTs laterally  
232 restrict RIP3/MIDD1-labelled ROP activity domains leading to lateral mutual inhibition of MTs  
233 and ROP activity and depletion of MTs from zones of high ROP11 activity [15]. Interestingly,  
234 the expression of RAC1 and MAGAP1 together with RIPA appeared to be sufficient to  
235 reconstitute a MT-controlled ROP-activation-deactivation module in barley. Asymmetric  
236 appearance of RIPA at the plasmamembrane in zones with very few or mostly lacking cortical  
237 MTs was reminiscent of the RIP3/MIDD1-labelled domains to ROP activity in Arabidopsis. We  
238 did not co-express any ROP-GEF in these cells and hence it seems that the barley epidermis  
239 possesses sufficient endogenous GEF activity to activate RAC1. This is further supported  
240 because expression of wild type RAC1 similar to expression of CA RAC1 recruited RIPA to the  
241 plasmamembrane in cells without co-expression of MAGAP1. We assume that RAC1 was  
242 activated by barley endogenous ROP-GEFs in these situations but hardly deactivated because  
243 no correspondingly high amount of ROP-GAP was present in those cells, and ROPs have only  
244 a weak intrinsic GTP-hydrolyzing activity [26]. However, additional co-expression of either  
245 untagged MAGAP1 or RFP-tagged MAGAP1 led to symmetry breaking of the plasma  
246 membrane. MAGAP1 may not directly interact with RIPA but with activated RAC1 in these  
247 situations as our yeast-two-hybrid assays support. Hence, MAGAP1 might fulfil a complex  
248 function in these situations. On the one hand, MAGAP1 is a classical ROP-GAP with a CRIB  
249 domain that supports binding to ROP-GTP and possesses a conserved catalytical arginine,  
250 which is predicted to hydrolyze ROP-bound GTP and appears to be required for the control of  
251 ROP effects [9]. On the other hand, MAGAP1 is directly associated to MTs by its

252 carboxyterminal domain and hence ideally positioned to perform a function in spatial feedback  
253 from MTs. This is different from Arabidopsis ROP-GAP3 for which no MT-association is  
254 reported. The idea, that MAGAP1 indeed function in lateral restriction of ROP activity domains  
255 in barley is strongly supported by the expression of truncated versions of MAGAP1, which  
256 interfered with membrane symmetry breaking. RIPA speckles were observed, when we co-  
257 expressed RAC1 with MAGAP1- $\Delta$ Cterm, which is detached from MTs by truncation of its C-  
258 terminus but possesses intact domains for ROP-GTP interaction and GTP hydrolysis [9].  
259 Catalytic activity of MAGAP1- $\Delta$ Cterm is supported because it is fully functional in limiting  
260 susceptibility to *Bgh* [9]. In this situation, MAGAP1- $\Delta$ Cterm occurred at the plasma membrane,  
261 to which it was most likely recruited by the co-expressed RAC1. We speculate that MAGAP1-  
262  $\Delta$ Cterm outcompetes RIPA from binding to RAC1 in this situation and additionally functions as  
263 a ROP-GAP such that most of the expressed RAC1 is deactivated immediately after loading  
264 GTP. Together, this could explain occurrence of RIPA in speckles, in which it otherwise was  
265 observed without co-expression of RAC1 or upon co-expression of DN RAC1. By contrast,  
266 RIPA more symmetrically labelled the cell periphery when MAGAP1-Cterm was expressed,  
267 which does not possess any ROP binding or GAP activity domain but still localizes to MTs.  
268 This also shows that MTs did not serve as a pure physical barrier to the diffusion of RIPA or  
269 RAC1 activity but as a physiological barrier dependent on the presence of full length  
270 MAGAP1. Together, both GAP activity and the spatial control of this activity near MTs appear  
271 necessary for symmetry breaking of ROP activity at the plasma membrane (see also Additional  
272 file 5 for a model). MAGAP1 has been suggested to function in MT-associated feedback on  
273 ROP activity in barley [9].

274 *RIPA might label a membrane domain of high ROP activity in interaction with Bgh.*

275 In *Bgh*-attacked cells, RIPA was also observed in membrane domains, when co-expressed  
276 with RAC1 and MAGAP1. However, the lateral restriction of RIPA-domains by MTs was less  
277 distinct. The overall intensity of RIPA labelling of the membrane was not very high when  
278 contrasted by local accumulation at the site of fungal infection. Because RIPA seems to  
279 preferentially accumulate at sites of high ROP or more specifically RAC1 activity, this might



280 indicate that RAC1 can be activated at sites of fungal attack. This is reminiscent of the  
281 accumulation of further ROP activity sensors such as RIC171 or RIPb at sites of fungal attack  
282 [27][18]. Together, these observations support earlier hypotheses of locally enhanced ROP  
283 activity at sites where *Bgh* attempts to penetrate [27, 28].

284 The physiological effect of this local ROP activity is not well understood and RIPa has no  
285 significant effect on the fungal penetration success when over-[18]. RAC1 seems to be  
286 involved in modulation of fungal penetration success in barley but this depends on whether CA  
287 RAC1 was expressed transiently or stably and on whether *Bgh* or *M. oryzae* was attacking [7,  
288 12]. The putative rice ortholog of barley RAC1 is also called RAC1. Rice RAC1 functions in  
289 chitin-triggered immunity and is activated via the chitin-signalling receptor kinase CERK1 and  
290 RAC-GEF1, a member of a plant-specific RHO-GEF family [29]. Chitin is a potent elicitor of  
291 early defense reactions in barley and can induce systemic resistance to *Bgh* infection [10, 30].  
292 However, it is unclear to what extent chitin elicitation contributes to basal resistance of barley  
293 in the authentic interaction with *Bgh*. We can only speculate that chitin elicitation is also  
294 involved in local activation of RAC1 in barley but this would explain why we observe local  
295 enrichment of the RAC1 activity sensor RIPa at sites where we can assume chitin elicitors from  
296 the fungal cell wall to be present.

## 297 **Conclusions**

298 Data suggest that barley RIPa interacts with barley ROPs and specifies RAC1-activity  
299 associated membrane domains with potential signaling capacity. Lateral diffusion of this RAC1  
300 signaling capacity is restricted by microtubules and MICROTUBULE-ASSOCIATED ROP-  
301 GTPASE ACTIVATING PROTEIN 1. Hence, an interplay of ROP activity and spatially confined  
302 MT-associated enzymatic restriction of ROP activity by MAGAP1 can provoke symmetry  
303 breaking at the plasma membrane of barley epidermal cells. Resulting membrane  
304 heterogeneity potentially reflects a mechanism by which monocot cells focus ROP activity  
305 comparable to what was reported before for dicots. Focal accumulation of RIPa at sites of  
306 fungal attack may further indicate locally restricted ROP activity at sites of fungal invasion.



307

## 308 **Methods**

309

### 310 *Plant and fungal material*

311 We used the barley (*Hordeum vulgare*) cultivar Golden Promise for transformation and  
312 inoculation experiments. We grew plants with a light dark cycle of 16h/8h at light intensity of  
313  $150 \mu\text{M s}^{-1} \text{m}^{-2}$  and 65% relative humidity and at 18°C. *Blumeria graminis* f.sp. *hordei* race A6  
314 was maintained on Golden Promise plants under the same conditions inoculated on plants by  
315 shaking plants with sporulating powdery mildew and blowing spores into a plastic trowel  
316 (200x50x50cm), which we had positioned over the naïve plants or transformed leaf segments  
317 on agar plates.

### 318 *Construction of expression constructs*

319 Barley *RIPa* (HORVU3Hr1G087430) was amplified from cDNA using gene-specific start to  
320 stop primers equipped with Xba1\_fwd and Xba1\_rev restriction sites for subcloning  
321 (*RIPa*Xba1\_fw 5'-TCTAGATATGCAGACAGCCAAGACAAG-3'; *RIPa*Xba1\_rev 5'-  
322 TCTAGATCATTCTTCCACATTCCACTG-3'). We ligated the amplicons into the pGEM-T  
323 easy vector (Promega, Madison, WI, USA) by blunt end cloning according to the  
324 manufacturer's instructions and sequenced the inserts. For Yeast Two-Hybrid assays *RIPa*  
325 was subcloned from the pGEM-T easy vector into pGADT7 plasmid (Clontech Laboratories)  
326 using the mentioned restriction sites. For over-expression and protein localization we used the  
327 high copy pGY1 plasmid, containing the CaMV35S promoter. We cut the *RIPa* insert by Xba1  
328 from the pGEM-T easy vector and ligated *HvRIPa* into the pGY1 plasmid or pGY1-YFP (without  
329 YFP STOP codon) plasmid to gain a N-terminal YFP fusion construct pGY1-YFP-*RIPa*.  
330 Orientation was confirmed by sequencing. For cloning into the Y2H pGADT7 vector, *RIPa* was  
331 amplified with *RIPa*\_Nde 5'- TGGATCCTCATTCTTCCACATTCCACTG-3' and  
332 *RIPa*\_BamH1 5'-ACATATGCAGACAGCCAAGACAAGG-3'. Construction of plant expression

333 and Y2H vectors for barley MAGAP1, RAC1 and RACB variants was described previously [7,  
334 9, 27]. Also, the construction of MAGAP1, RFP-MAGAP1 and truncated versions of this was  
335 described previously [9].

### 336 *Biolistic transformation of barley leaf segments*

337 We transformed barley epidermal cells by biolistic particle bombardment with PDS-1000/HE  
338 (Biorad, Hercules, CA; USA) as described earlier [31]. Therefore, we placed segments of 7d  
339 old primary leaves of barley on 0.8-1% (w/v) water-agar. For each shot, we precipitated 1µg  
340 plasmid DNA on 302.5 µg of 1µm gold particles (Biorad, Hercules, CA, USA) by adding the  
341 same volume of 1M CaCl<sub>2</sub>. Half the DNA amount was used for pGY1-mCherry transformation  
342 markers. Finally, we added 3µl per shot of 2mg/ml protamine (Sigma) were. We subsequently  
343 (30 min later at RT) washed twice the plasmid-coated gold with 500µl of first 70% (v/v) and  
344 second 100% ethanol. The resuspended gold particles were then pipetted (6 µl) on the macro  
345 carrier for bombardment.

346

347

### 348 *Subcellular localization and protein recruitment in planta*

349 Localization of YFP-HvRIPa either expressed alone or simultaneously with different versions  
350 of RAC1, RACB and MAGAP1 was performed at the indicated time points after transient  
351 transformation of barley leaves. We imaged single transformed cells with a Leica TCS SP5  
352 confocal laser scanning microscope and the use of hybrid HyD detectors. Excitation and  
353 emission wavelength were individually adapted to the respective fluorophores as described  
354 before and images were recorded by sequentially scanning line-by-line with a 3-times  
355 averaging [9, 27].

356

### 357 *Yeast two-hybrid assays*

358 Constructs were transformed into yeast strain AH109 following the small-scale LiAc yeast  
359 transformation procedure from the Yeast Protocol Handbook (Clontech, Mountain View, CA,  
360 USA). Bait- and prey-construct transformed yeast cells were dropped on either transformation-  
361 selected (SD -L-W) or interaction-selective (SD -L,-W,-A-H) medium. pGADT7 and pGBKT7  
362 were included as empty vector controls to exclude auto-activity of respective constructs.

363

### 364 **Abbreviations**

365 *Bgh*: *Blumeria graminis* f.sp. *hordei*; CA: constitutively activated; CRIB: CDC42/RAC-  
366 Interactive Binding; DN: dominant negative; GAP: GTPase-activating protein; GEF: guanine  
367 nucleotide exchange factors; ICR: Interactor of Constitutive Active ROPs; RAC: Ras (Rat  
368 *sarcoma*)-related C3 botulinum toxin substrate 1; RIC: ROP-Interactive CRIB motif-containing  
369 proteins; RIP: ROP-Interactive Partner; ROP: RHO of plants MIDD1: microtubule depletion  
370 domain 1; MAGAP1: MICROTUBULE-ASSOCIATED ROP-GTPASE ACTIVATING PROTEIN  
371 1; MT: microtubule

372

### 373 **Ethics approval and consent to participate**

374 Not applicable

### 375 **Consent for publication**

376 Not applicable

### 377 **Availability of data and material**

378 All the data supporting our findings is contained within the manuscript. Constructs and seeds  
379 are available upon request from TUM.

### 380 **Competing interests**

381 The authors declare no competing interests.

## 382 **Funding**

383 The project was funded in frame of research grants from the German Research Foundation to  
384 RH (DFG HU886-8).

## 385 **Authors' contributions**

386 RH developed the research questions, designed the study, prepared figures and wrote the  
387 manuscript. CH and CM designed and performed the experiments and prepared figures.

## 388 **Acknowledgements**

389 We are grateful to Stefan Engelhardt (TU Munich, Chair of Phytopathology) for technical advice  
390 and fruitful discussions and to Vera Schnepf (TU Munich Phytopathology) who performed pilot  
391 experiments on barley RIPa.

392

## 393 **References**

- 394 1. Lawson CD, Ridley AJ: **Rho GTPase signaling complexes in cell migration and**  
395 **invasion.** *J Cell Biol* 2018, **217**:447-457.
- 396 2. Zheng ZL, Yang ZB: **The Rop GTPase: an emerging signaling switch in plants.**  
397 *Plant Molecular Biology* 2000, **44**:1-9.
- 398 3. Feiguelman G, Fu Y, Yalovsky S: **ROP GTPases Structure-Function and Signaling**  
399 **Pathways.** *Plant Physiol* 2018, **176**:57-79.
- 400 4. Kawano Y, Kaneko-Kawano T, Shimamoto K: **Rho family GTPase-dependent**  
401 **immunity in plants and animals.** *Frontiers in Plant Science* 2014, **5**:522.
- 402 5. Kost B: **Spatial control of Rho (Rac-Rop) signaling in tip-growing plant cells.**  
403 *Trends in Cell Biology* 2008, **18**:119-127.
- 404 6. Platre MP, Bayle V, Armengot L, Bareille J, Marques-Bueno MDM, Creff A, Maneta-  
405 Peyret L, Fiche JB, Nollmann M, Miege C, et al: **Developmental control of plant Rho**  
406 **GTPase nano-organization by the lipid phosphatidylserine.** *Science* 2019, **364**:57-  
407 62.

- 408 7. Schultheiss H, Dechert C, Kogel KH, Hückelhoven R: **Functional analysis of barley**  
409 **RAC/ROP G-protein family members in susceptibility to the powdery mildew**  
410 **fungus.** *Plant Journal* 2003, **36**:589-601.
- 411 8. Schultheiss H, Dechert C, Kogel KH, Hückelhoven R: **A small GTP-binding host**  
412 **protein is required for entry of powdery mildew fungus into epidermal cells of**  
413 **barley.** *Plant Physiology* 2002, **128**:1447-1454.
- 414 9. Hoefle C, Huesmann C, Schultheiss H, Boernke F, Hensel G, Kumlehn J, Hückelhoven  
415 R: **A barley ROP GTPase ACTIVATING PROTEIN associates with microtubules**  
416 **and regulates entry of the barley powdery mildew fungus into leaf epidermal**  
417 **cells.** *Plant Cell* 2011, **23**:2422-2439.
- 418 10. Scheler B, Schnepf V, Galgenmuller C, Ranf S, Huckelhoven R: **Barley disease**  
419 **susceptibility factor RACB acts in epidermal cell polarity and positioning of the**  
420 **nucleus.** *J Exp Bot* 2016, **67**:3263-3275.
- 421 11. Nottensteiner M, Zechmann B, McCollum C, Huckelhoven R: **A barley powdery**  
422 **mildew fungus non-autonomous retrotransposon encodes a peptide that**  
423 **supports penetration success on barley.** *J Exp Bot* 2018, **69**:3745-3758.
- 424 12. Pathuri IP, Zellerhoff N, Schaffrath U, Hensel G, Kumlehn J, Kogel K-H, Eichmann R,  
425 Hückelhoven R: **Constitutively activated barley ROPs modulate epidermal cell**  
426 **size, defense reactions and interactions with fungal leaf pathogens.** *Plant Cell*  
427 *Reports* 2008, **27**:1877-1887.
- 428 13. Huesmann C, Reiner T, Hoefle C, Preuss J, Jurca ME, Domoki M, Fehér A,  
429 Hückelhoven R: **Barley ROP binding kinase1 is involved in microtubule**  
430 **organization and in basal penetration resistance to the barley powdery mildew**  
431 **fungus.** *Plant Physiology* 2012, **159**:311–320.
- 432 14. Mucha E, Hoefle C, Hückelhoven R, Berken A: **RIP3 and AtKinesin-13A-A novel**  
433 **interaction linking Rho proteins of plants to microtubules.** *European Journal of*  
434 *Cell Biology* 2010, **89**:906-916.

- 435 15. Oda Y, Fukuda H: **Rho of Plant GTPase Signaling Regulates the Behavior of**  
436 **Arabidopsis Kinesin-13A to Establish Secondary Cell Wall Patterns.** *Plant Cell*  
437 2013, **25**:4439-4450.
- 438 16. Oda Y, Fukuda H: **Initiation of Cell Wall Pattern by a Rho- and Microtubule-Driven**  
439 **Symmetry Breaking.** *Science* 2012, **337**:1333-1336.
- 440 17. Oda Y, Iida Y, Kondo Y, Fukuda H: **Wood cell-wall structure requires local 2D-**  
441 **microtubule disassembly by a novel plasma membrane-anchored protein.** *Curr*  
442 *Biol* 2010, **20**:1197-1202.
- 443 18. McCollum C, Engelhardt S, Hüchelhoven R: **ROP-INTERACTIVE PARTNER b**  
444 **interacts with the ROP GTPase RACB and supports fungal penetration in barley.**  
445 (in preparation).
- 446 19. Lavy M, Yalovsky S: **Association of Arabidopsis type-II ROPs with the plasma**  
447 **membrane requires a conserved C-terminal sequence motif and a proximal**  
448 **polybasic domain.** *Plant Journal* 2006, **46**:934-947.
- 449 20. Zeyen RJ, Carver TLW, Lyngkjaer MF: **Epidermal cell papillae.** *Powdery Mildews: A*  
450 *Comprehensive Treatise* 2002:107-125.
- 451 21. Wolf S, Hematy K, Hofte H: **Growth control and cell wall signaling in plants.** *Annu*  
452 *Rev Plant Biol* 2012, **63**:381-407.
- 453 22. Yang Z, Lavagi I: **Spatial control of plasma membrane domains: ROP GTPase-**  
454 **based symmetry breaking.** *Current Opinion in Plant Biology* 2012, **15**:601-607.
- 455 23. Hüchelhoven R, Panstruga R: **Cell biology of the plant-powdery mildew interaction.**  
456 *Current Opinion in Plant Biology* 2011, **14**:738-746.
- 457 24. Li S, Gu Y, Yan A, Lord E, Yang ZB: **RIP1 (ROP Interactive Partner 1)/ICR1 marks**  
458 **pollen germination sites and may act in the ROP1 pathway in the control of**  
459 **polarized pollen growth.** *Mol Plant* 2008, **1**:1021-1035.
- 460 25. Lavy M, Bloch D, Hazak O, Gutman I, Poraty L, Sorek N, Sternberg H, Yalovsky S: **A**  
461 **novel ROP/RAC effector links cell polarity, root-meristem maintenance, and**  
462 **vesicle trafficking.** *Current Biology* 2007, **17**:947-952.

- 463 26. Berken A: **ROPs in the spotlight of plant signal transduction.** *Cellular and Molecular*  
464 *Life Sciences* 2006, **63**:2446-2459.
- 465 27. Schultheiss H, Preuss J, Pircher T, Eichmann R, Hückelhoven R: **Barley RIC171**  
466 **interacts with RACB in planta and supports entry of the powdery mildew fungus.**  
467 *Cellular Microbiology* 2008, **10**:1815-1826.
- 468 28. Dörmann P, Kim H, Ott T, Schulze-Lefert P, Trujillo M, Wewer V, Hückelhoven R: **Cell-**  
469 **autonomous defense, re-organization and trafficking of membranes in plant-**  
470 **microbe interactions.** *New Phytologist* 2014, **204**:815-822.
- 471 29. Akamatsu A, Wong HL, Fujiwara M, Okuda J, Nishide K, Uno K, Imai K, Umemura K,  
472 Kawasaki T, Kawano Y, Shimamoto K: **An OsCEBiP/OsCERK1-OsRacGEF1-**  
473 **OsRac1 Module Is an Essential Early Component of Chitin-Induced Rice**  
474 **Immunity.** *Cell Host & Microbe* 2013, **13**:465-476.
- 475 30. Kasbauer CL, Pathuri IP, Hensel G, Kumlehn J, Huckelhoven R, Proels RK: **Barley**  
476 **ADH-1 modulates susceptibility to Bgh and is involved in chitin-induced**  
477 **systemic resistance.** *Plant Physiol Biochem* 2018, **123**:281-287.
- 478 31. Douchkov D, Nowara D, Zierold U, Schweizer P: **A high-throughput gene-silencing**  
479 **system for the functional assessment of defense-related genes in barley**  
480 **epidermal cells.** *Mol Plant Microbe Interact* 2005, **18**:755-761.

481

482

483

484 Figure Legends

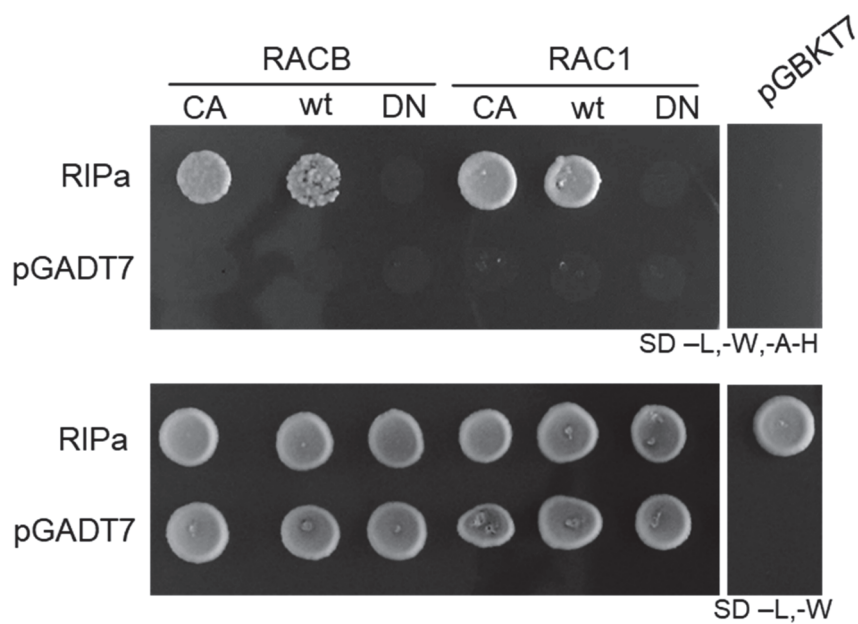

485

486 Fig. 1: Barley RIPa interacts with barley type I and type II ROPs in yeast. Bait- and prey-  
487 construct transformed yeast cells were dropped on either transformation-selected (SD -L-W)  
488 or interaction-selective (SD -L,-W,-A-H) medium. pGADT7 and pGBKT7 present empty vector  
489 controls to exclude auto-activity of respective ROP or RIPa constructs.

490



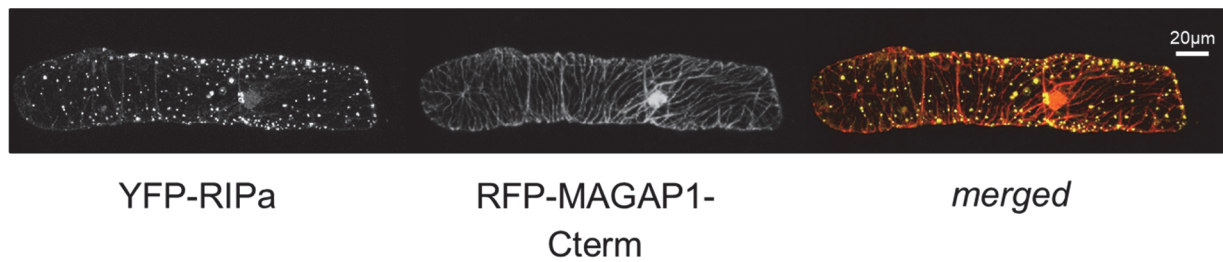

491

492 Fig. 2: Single cell-expressed barley YFP-RIPa localizes to immobile speckles and the  
493 cytoplasm. Whole cell Z-stack images were taken 24 h after biolistic transformation of barley  
494 epidermal cells. The MT-marker RFP-MAGAP1-Cterm was co-expressed to visualize MTs.

495

496

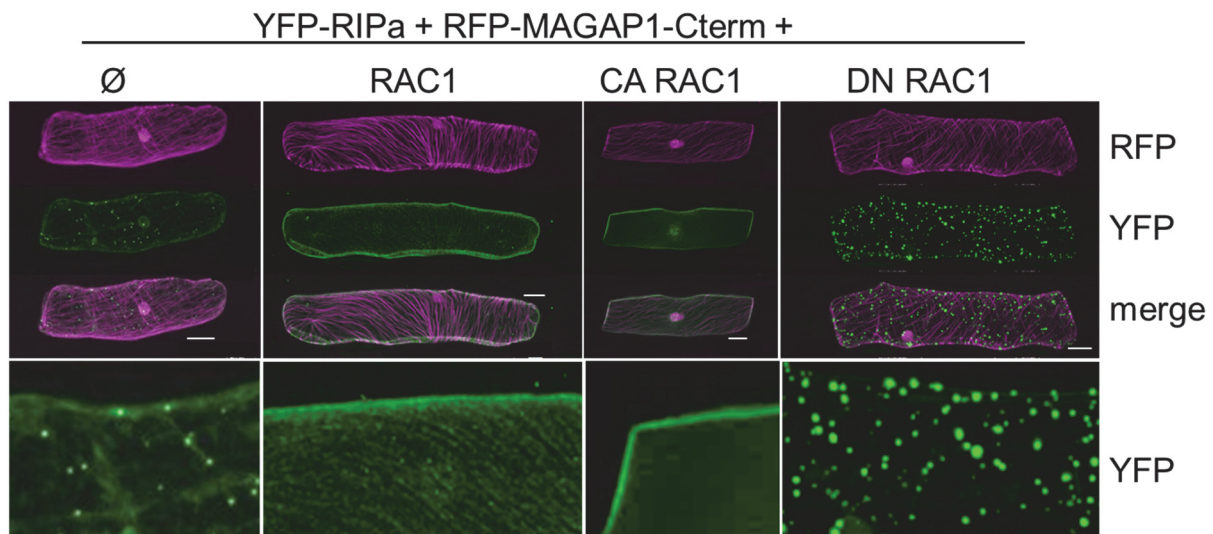

497

498 Fig. 3: Single cell expressed barley YFP-RIPa changes subcellular localization upon co-  
499 expression of untagged RAC1. YFP-RIPa alone ( $\emptyset$ ) localizes to immobile speckles and the  
500 cytoplasm. Co-expression of untagged RAC1 (WT RAC1) leads to plasma membrane and MT  
501 association of YFP-RIPs, co-expression of CA RAC1 leads to plasma membrane localization  
502 of YFP-RIPa and DN RAC1 leads to speckle-association of YFP-RIPa. The lower panels show  
503 digital magnifications of the YFP-RIPa signals with 40% enhanced brightness. Whole cell Z-  
504 stack images were taken 24 h after biolistic transformation of barley epidermal cells. The MT-  
505 marker RFP-MAGAP1-Cterm was co-expressed to visualize MTs. Bars represent 20  $\mu$ m.

506

507

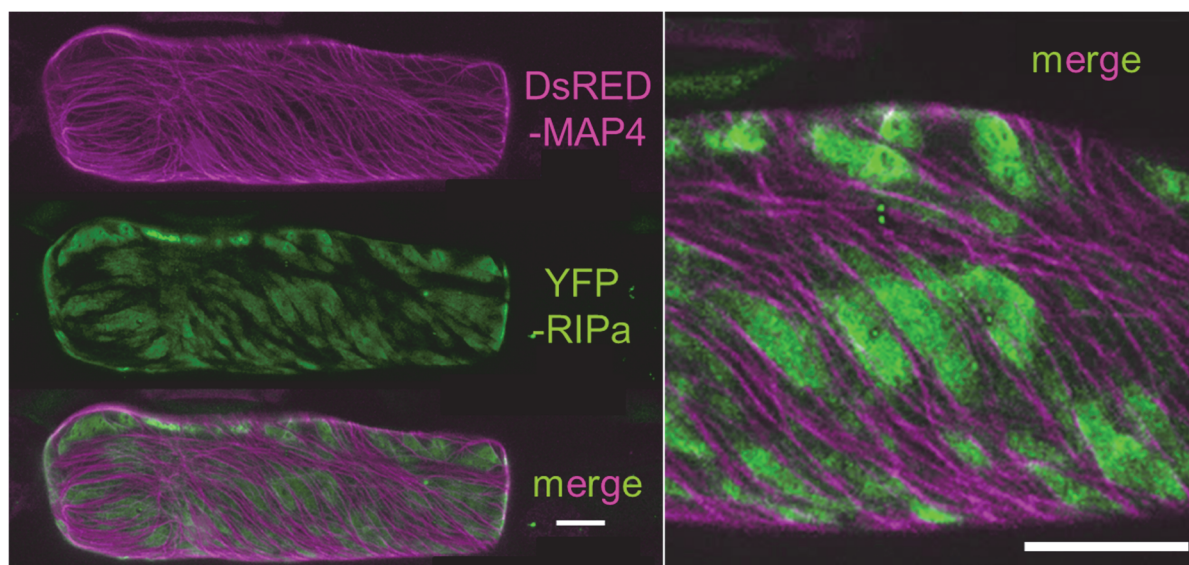

YFP-RIPa + MAGAP1 + RAC1 +DsRED-MAP4

508

509 Fig. 4. Barley YFP-RIPa localizes to MT-restricted domains of the cell periphery/plasma  
510 membrane when co-expressed with wild type RAC1 and MAGAP1. Whole cell Z-stack images  
511 were taken 24 h after biolistic transformation of barley epidermal cells. The MT-marker DsRED-  
512 MAP4 was co-expressed to visualize MTs. The right panel shows a digital magnification with  
513 40% enhanced brightness. Bars represent 20 μm.

514

RAC1 + YFP-RIPa + MAGAP1 + RFP-MAGAP1-Cterm +

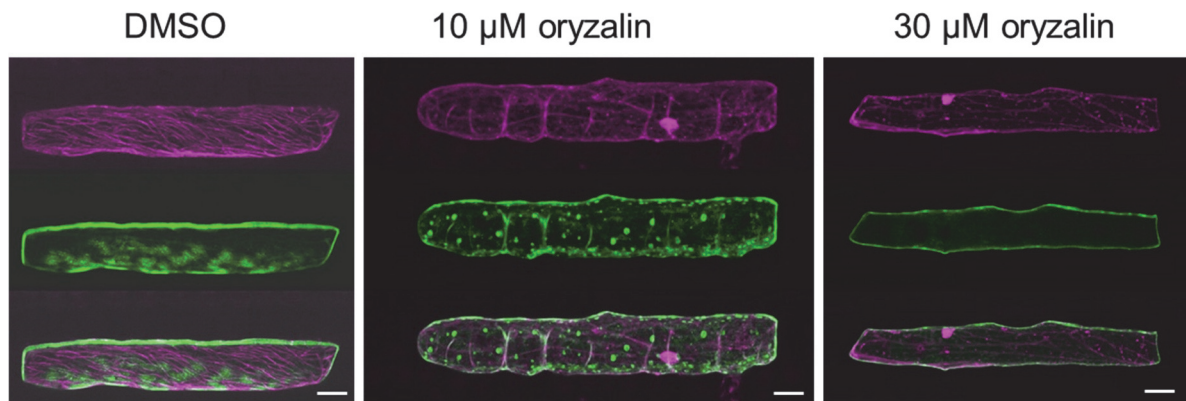

515

516 Fig. 5. Disturbance of YFP-RIPa localization to MT-restricted domains of the cell  
517 periphery/plasma membrane. YFP-RIPa (shown in green) when co-expressed with wild type  
518 RAC1 and MAGAP1 can be found in MT-restricted domains of the cell periphery/plasma  
519 membrane (see left panel for DMSO solvent control). This localization is dissolved when MTs  
520 are destroyed by either 10 or 30 μM oryzalin treatment (solved in 0,25% [v/v] DMSO, treated  
521 for 3,2h before imaging). Whole cell Z-stack images were taken 24 h after biolistic  
522 transformation of barley epidermal cells. The MT-marker RFP-MAGAP1-Cterm (shown in  
523 magenta) was co-expressed to visualize MTs. Bars represent 30 μm.

524

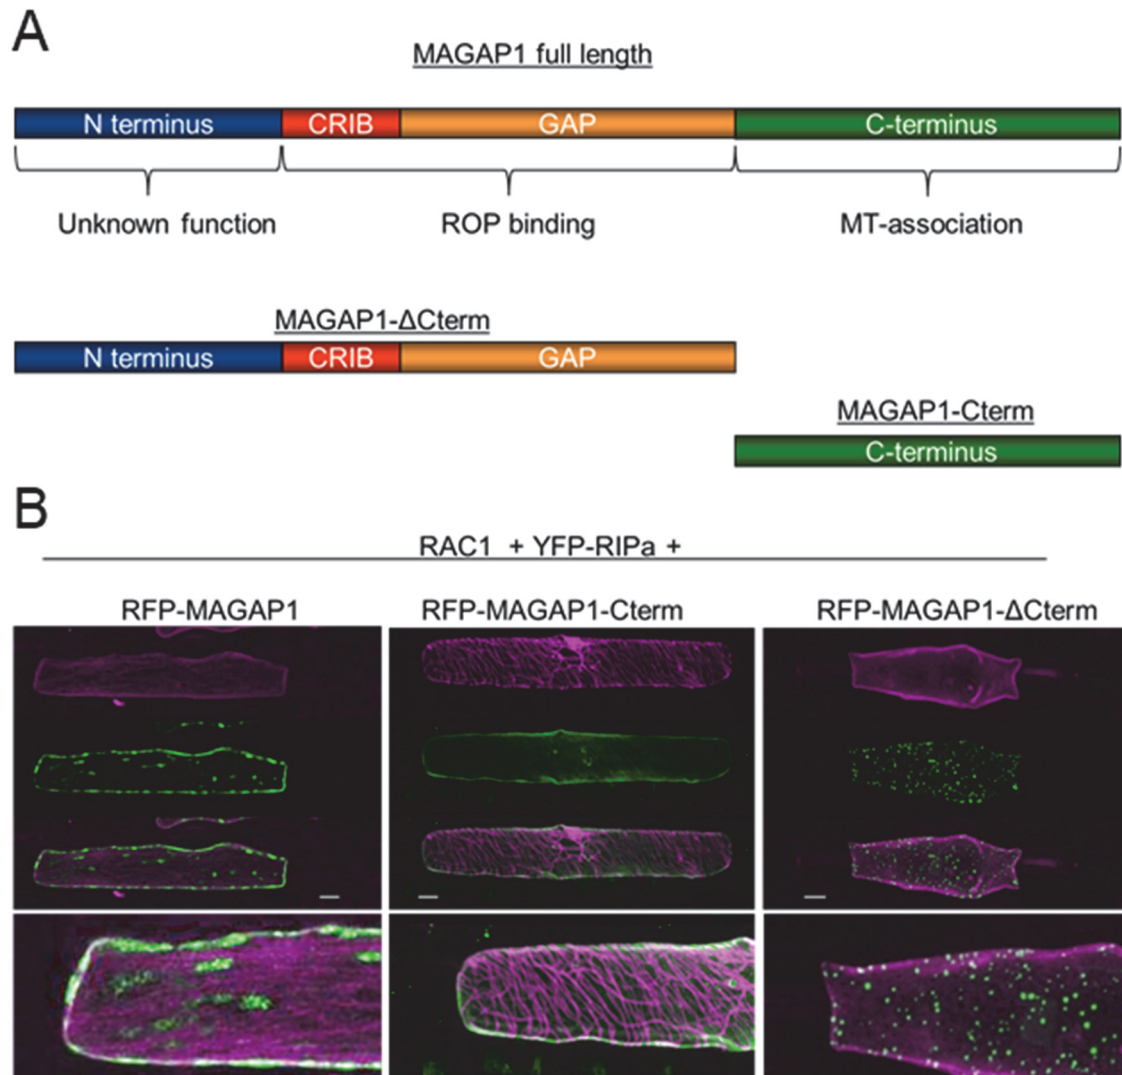

525

526 Fig. 6. Functional domains of MAGAP1 determine the formation of YFP-RIPa membrane  
527 domains. A. Domain architecture of MAGAP1 and of truncated versions of MAGAP1, which  
528 were expressed as RFP fusion proteins. B. Co-expression of fluorescent YFP-RIPa (shown in  
529 green) and untagged RAC1 with three versions of RFP-MAGAP1 (shown in magenta) with or  
530 without ROP-binding and MT-association domains as depicted in A. Whole cell Z-stack images  
531 were taken 24 h after biolistic transformation of barley epidermal cells. Bars represent 20  $\mu$ m.

532



533

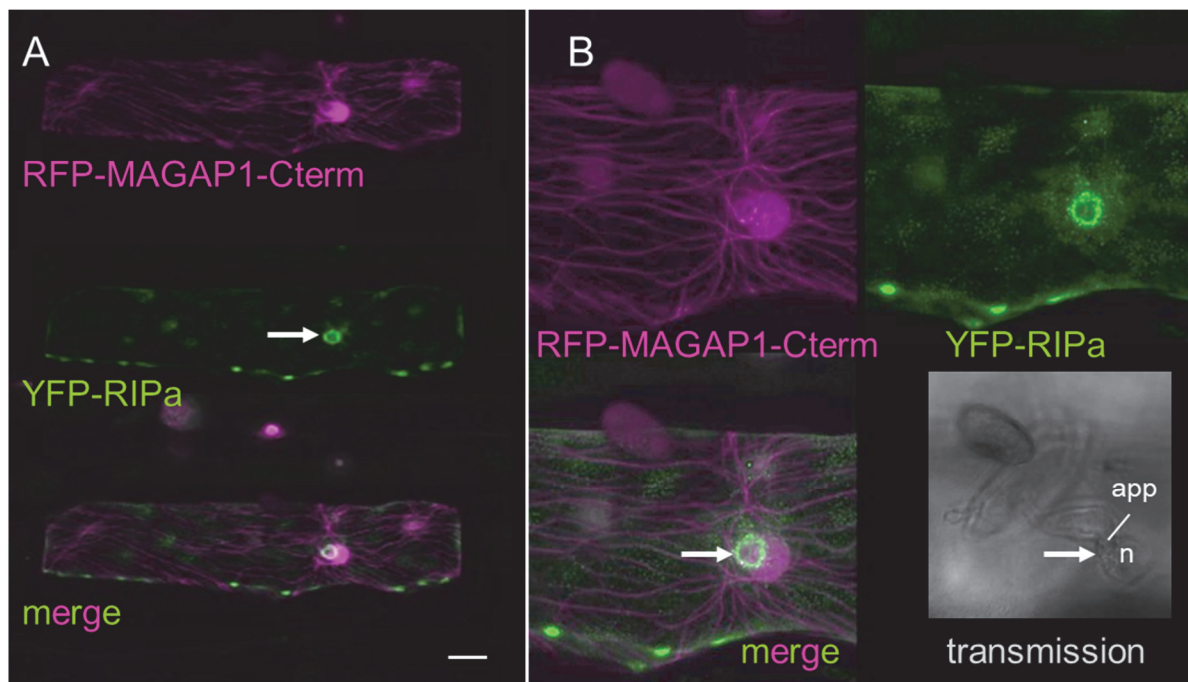

534

535 Fig. 7. YFP-RIPa localization at sites of fungal attack by *Bgh*. A. Whole cell Z-stack images  
536 were taken 28 h after biolistic transformation of barley epidermal cells and 23 h after  
537 inoculation. The MT-marker RFP-MAGAP1-Cterm was co-expressed to visualize MTs. Bars  
538 represent 20  $\mu$ m. Additionally, untagged RAC1 and untagged MAGAP1 are co-expressed. B.  
539 Same cell as in A imaged at a higher zoom factor. Brightness was enhanced by 40 % after  
540 imaging. Please note the fungal attack from an appressorium (app). YFP-RIPa is visible in  
541 membrane patches and around the site of attack (arrow). n, plant nucleus.

542

543 **ADDITIONAL FILES:**

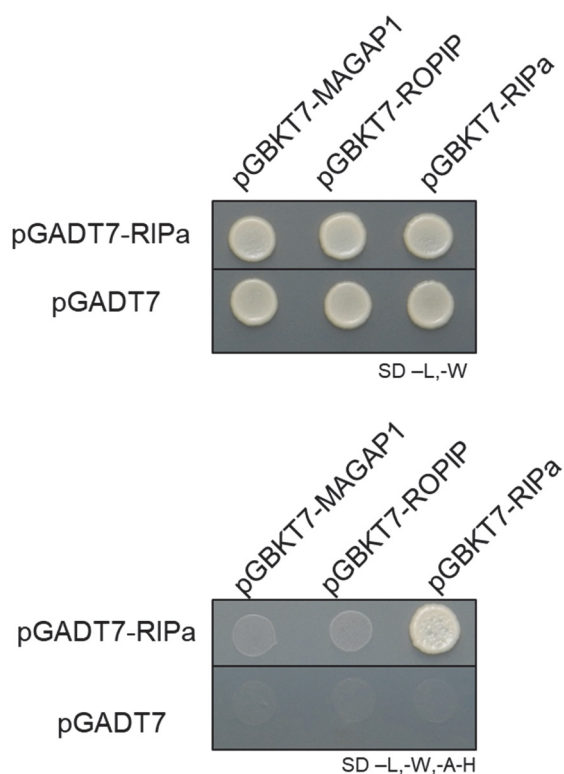

544

545 Additional file 1: Figure S1. Barley RIPa interacts with itself in yeast. Bait- and prey-construct  
546 transformed yeast cells were dropped on either transformation-selected (SD -L-W) or  
547 interaction-selective (SD -L,-W,-A-H) medium. pGADT7 presents empty vector controls to  
548 exclude auto-activity of respective constructs.

549

550

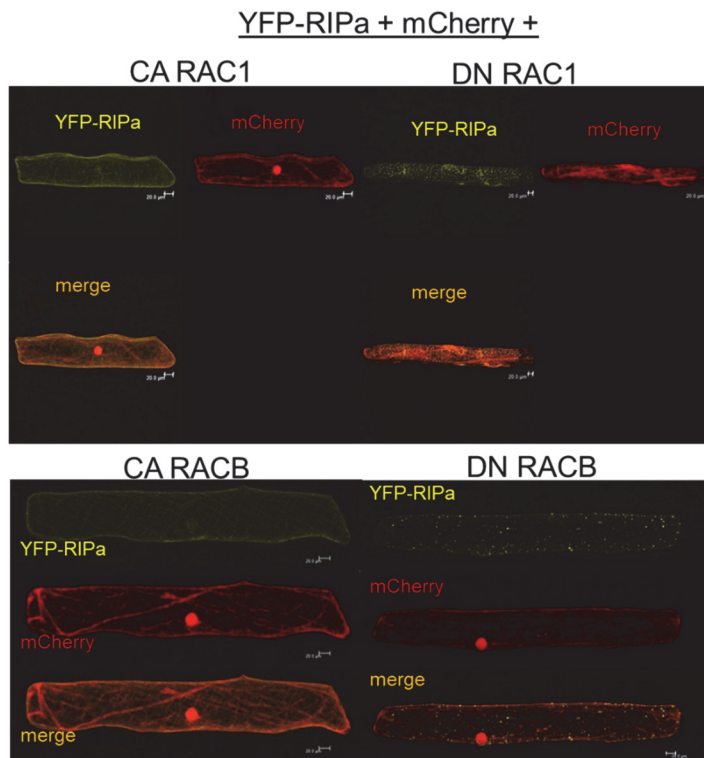

551

552 Additional file 2: Figure S2. Barley YFP-RIPa localizes to the cell periphery when co-expressed  
553 with CA RAC1 or CA RACB (left panels) and to speckles of unknown nature when co-  
554 expressed with DN RAC1 or DN RACB (right panels. Whole cell Z-stack images were taken  
555 24 h after biolistic transformation of barley epidermal cells. The cytosolic marker mCherry was  
556 co-expressed to contrast the cytoplasm.

557



558

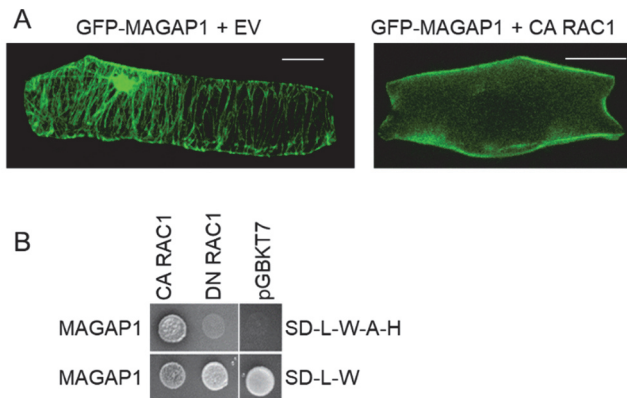

559

560 Additional file 3: Figure S3. Interaction between MAGAP1 and RAC1. A. Change of GFP-  
561 MAGAP1 localization upon co-expression of CA RAC1 Whole cell Z-stack images were taken  
562 24 h after biolistic transformation of barley epidermal cells. The MT-marker DsRED-MAP4 was  
563 co-expressed to visualize MTs. Bars represent 20  $\mu$ m. B. C. Barley MAGAP1 interacts with the  
564 barley type II ROP RAC1 in yeast. Bait- and prey construct-transformed yeast cells were  
565 dropped on either transformation-selected (SD -L-W) or interaction-selective (SD -L,-W,-A-H)  
566 medium. pGADT7 and pGBKT7 represent an empty vector control to exclude auto-activity of  
567 the MAGAP1 construct.

568

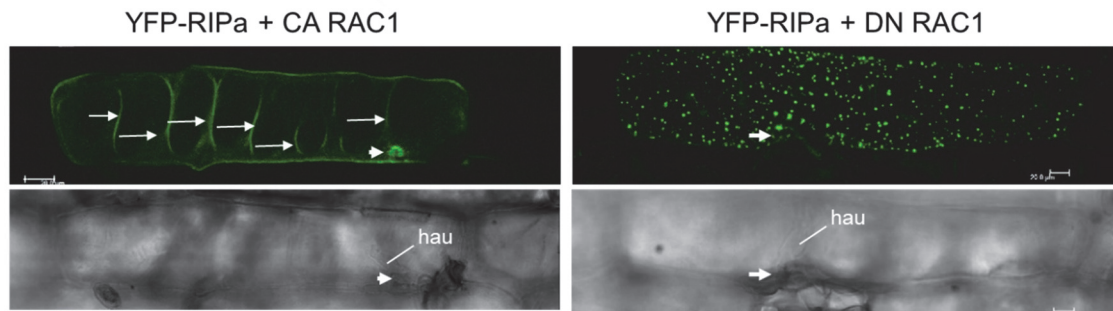

569

570 Additional file 4: Figure S4. YFP-RIPa localization at sites of fungal attack by *Bgh* but not when  
571 DN RAC1 is co-expressed. Whole cell Z-stack images were taken 28 h after biolistic  
572 transformation of barley epidermal cells and 23 h after inoculation. Additionally, untagged CA  
573 RAC1 or DN RAC1 are co-expressed. Brightness was enhanced by 20 % after imaging. Please  
574 note the fungal attack from an appressorium (app). Site of attack, arrow; hau; fungal  
575 haustorium. Long arrows mark plasma membrane folds at cell wall protrusions at the cell  
576 bottom facing mesophyll cells. Bars represent 20  $\mu$ m.

577

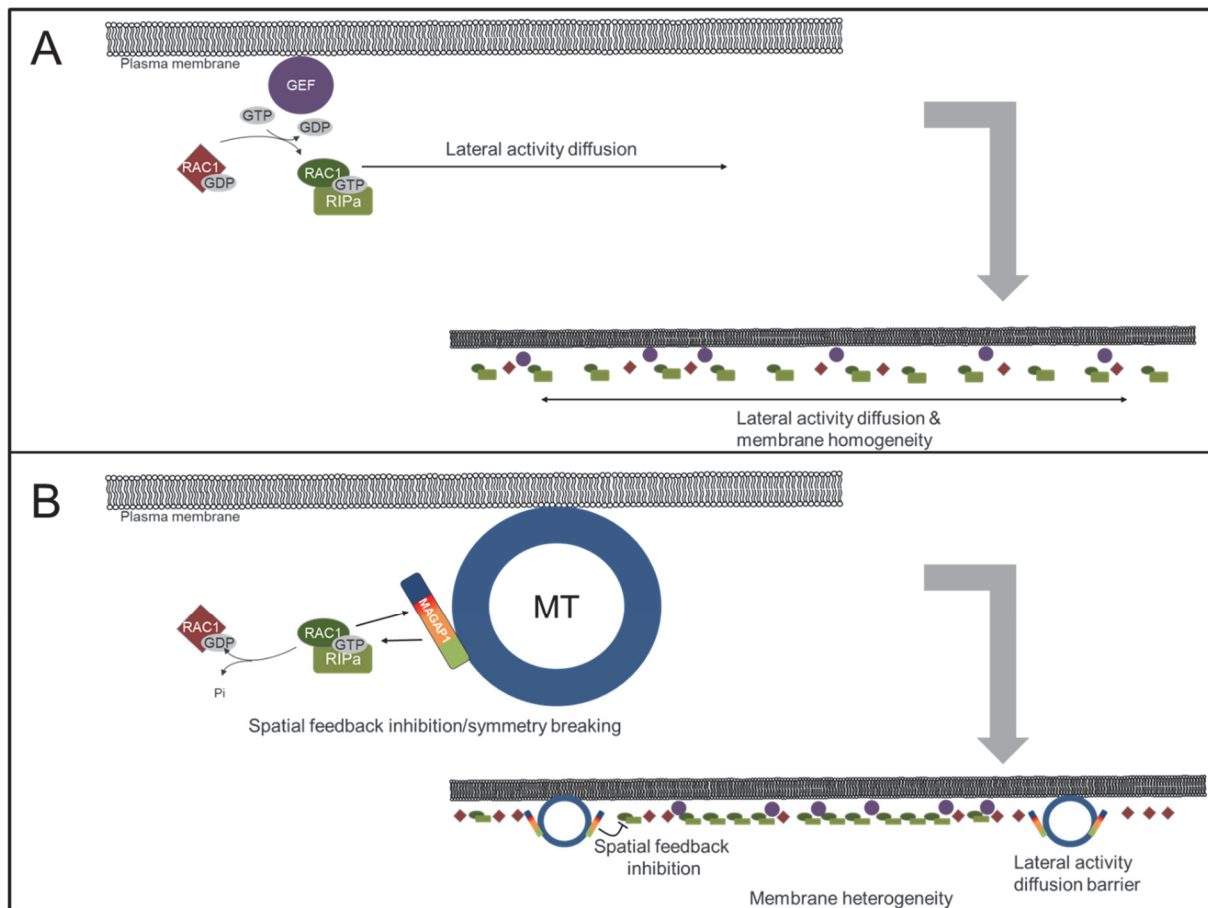

578

579

580 Additional file 5: Figure S5. MT and MAGAP1-dependent symmetry breaking of plasma  
581 membrane-associated RAC1-RIPa signaling. A. In absence of MTs and MAGAP1, GEF-  
582 supported RAC1 activity can freely diffuse at the plasma membrane and RIPa is evenly  
583 distributed. B. In presence of intact MTs and functional MT-associated MAGAP1, MAGAP1  
584 laterally inhibits RAC1 activity from MTs. This leads to spatially restricted negative feedback,  
585 and hence symmetry breaking and membrane heterogeneity.

586

587
